# Supplementary material for: Proteins from Lignosus tigris with selective apoptotic cytotoxicity towards MCF7 cell line and suppresses MCF7-xenograft tumor growth
Source: PeerJ journal article supplement (doi:10.7717/peerj.9650), 2020-08-04
Supplement: Supplemental_Table_S1.pdf [file Supplemental_Table_S1.pdf]

**Table S1:****List of Ligno TG-K HMWp proteins identified by LC-MS/MS using *L. rhinocerus* TM02 genome as search database.**

| Section | Spectra (#) | Distinct Peptides (#) | Distinct Summed MS/MS Search Score | % AA Coverage | Protein MW (Da) | Protein (pI) | Mean Peptide Spectral Intensity | Protein Relative % | Database Accession # | Protein Name                                          |
|---------|-------------|-----------------------|------------------------------------|---------------|-----------------|--------------|---------------------------------|--------------------|----------------------|-------------------------------------------------------|
| S1      | 4           | 3                     | 51.70                              | 10.5          | 42840.1         | 5.38         | 9.75E+05                        | 1.30               | GME1230_g            | 230NA                                                 |
| S1      | 5           | 5                     | 68.26                              | 14.6          | 46919.6         | 4.86         | 3.00E+05                        | 0.40               | GME8314_g            | Alpha-galactosidase                                   |
| S1      | 4           | 4                     | 66.10                              | 8.2           | 87418.5         | 6.39         | 3.93E+05                        | 0.52               | GME2056_g            | Exo-beta-1,3-glucanase                                |
| S1      | 4           | 3                     | 48.29                              | 15.0          | 19144.0         | 5.23         | 6.05E+05                        | 0.81               | GME272_g             | Lectin                                                |
| S1      | 2           | 2                     | 34.37                              | 4.9           | 48016.9         | 4.93         | 2.93E+05                        | 0.39               | GME4019_g            | Phosphatidylserine decarboxylase-related              |
| S1      | 6           | 3                     | 39.84                              | 8.0           | 45492.5         | 5.73         | 5.32E+06                        | 7.08               | GME4347_g            | Serine protease                                       |
| S2      | 4           | 2                     | 41.25                              | 8.5           | 42840.1         | 5.38         | 2.44E+06                        | 1.04               | GME1230_g            | 230NA                                                 |
| S2      | 3           | 3                     | 50.53                              | 10.4          | 39970.8         | 5.57         | 5.50E+05                        | 0.23               | GME335_g             | Chain A, 3-D structure of a novel pore-forming lectin |
| S2      | 16          | 12                    | 216.61                             | 31.8          | 46919.6         | 4.86         | 1.76E+06                        | 0.75               | GME8314_g            | Alpha-galactosidase                                   |
| S2      | 2           | 2                     | 33.29                              | 2.4           | 82123.2         | 5.07         | 1.70E+06                        | 0.72               | GME7894_g            | Beta-glucosidase                                      |
| S2      | 2           | 2                     | 26.57                              | 1.9           | 119603.8        | 5.76         | 3.68E+05                        | 0.16               | GME8214_g            | Carotenoid ester lipase precursor                     |
| S2      | 12          | 8                     | 128.72                             | 13.8          | 87418.5         | 6.39         | 5.82E+05                        | 0.25               | GME2056_g            | Exo-beta-1,3-glucanase                                |
| S2      | 2           | 2                     | 29.47                              | 1.9           | 175173.6        | 6.71         | 3.43E+05                        | 0.15               | GME9535_g            | Glycoside hydrolase family 79 protein                 |
| S2      | 5           | 5                     | 73.67                              | 6.4           | 90964.3         | 5.55         | 2.04E+05                        | 0.09               | GME7001_g            | Glycoside hydrolase family 95 protein                 |
| S2      | 2           | 2                     | 29.67                              | 3.0           | 60459.0         | 5.97         | 3.10E+05                        | 0.13               | GME7180_g            | Glyoxal oxidase precursor                             |
| S2      | 3           | 2                     | 26.20                              | 2.2           | 149581.5        | 6.45         | 4.20E+05                        | 0.18               | GME8409_g            | Hypothetical protein MGG_05540                        |
| S2      | 3           | 2                     | 36.21                              | 3.5           | 54630.2         | 4.6          | 2.80E+06                        | 1.19               | GME4362_g            | Hypothetical protein SCHCODRAFT_50312                 |
| S2      | 4           | 3                     | 52.55                              | 15.0          | 19144.0         | 5.23         | 2.12E+06                        | 0.90               | GME272_g             | Lectin                                                |
| S2      | 3           | 3                     | 45.66                              | 6.2           | 70156.9         | 5.75         | 3.70E+05                        | 0.16               | GME1854_g            | Pc20g15160                                            |
| S2      | 3           | 2                     | 28.01                              | 4.9           | 48016.9         | 4.93         | 4.00E+05                        | 0.17               | GME4019_g            | Phosphatidylserine decarboxylase-related              |
| S2      | 8           | 7                     | 132.51                             | 19.2          | 53784.7         | 6.56         | 1.06E+06                        | 0.45               | GME590_g             | Predicted protein                                     |
| S2      | 5           | 5                     | 75.21                              | 9.7           | 58776.8         | 5.57         | 2.18E+05                        | 0.09               | GME877_g             | Predicted protein                                     |
| S2      | 5           | 4                     | 72.73                              | 13.1          | 56897.8         | 4.37         | 9.90E+05                        | 0.42               | GME9508_g            | Predicted protein                                     |

**Table S1, continued**

| Section | Spectra (#) | Distinct Peptides (#) | Distinct Summed MS/MS Search Score | % AA Coverage | Protein MW (Da) | Protein (pI) | Mean Peptide Spectral Intensity | Protein Relative % | Database Accession # | Protein Name                                          |
|---------|-------------|-----------------------|------------------------------------|---------------|-----------------|--------------|---------------------------------|--------------------|----------------------|-------------------------------------------------------|
| S2      | 2           | 2                     | 27.77                              | 4.3           | 45492.5         | 5.73         | 5.20E+05                        | 0.22               | GME4347_g            | Serine protease                                       |
| S2      | 2           | 2                     | 35.67                              | 3.7           | 101472.6        | 6.57         | 2.05E+05                        | 0.09               | GME3952_g            | Vacuolar protein sorting-associated protein 70        |
| S3      | 4           | 2                     | 45.32                              | 8.5           | 42840.1         | 5.38         | 5.65E+06                        | 2.40               | GME1230_g            | 230NA                                                 |
| S3      | 8           | 5                     | 93.82                              | 12.6          | 39970.8         | 5.57         | 2.18E+06                        | 0.93               | GME335_g             | Chain A, 3-D structure of a novel pore-forming lectin |
| S3      | 2           | 2                     | 29.77                              | 19.3          | 13281.2         | 9.48         | 2.57E+05                        | 0.11               | GME1876_g            | 876NA                                                 |
| S3      | 2           | 2                     | 37.79                              | 9.2           | 34079.5         | 6.92         | 1.10E+06                        | 0.47               | GME6852_g            | Acid phosphatase                                      |
| S3      | 4           | 4                     | 73.17                              | 11            | 46919.6         | 4.86         | 1.19E+05                        | 0.05               | GME8314_g            | Alpha-galactosidase                                   |
| S3      | 4           | 4                     | 56.66                              | 6.7           | 60026           | 5.45         | 2.14E+05                        | 0.09               | GME5195_g            | ATP-dependent Zn protease                             |
| S3      | 3           | 3                     | 41.11                              | 4             | 82123.2         | 5.07         | 2.27E+05                        | 0.10               | GME7894_g            | Beta-glucosidase                                      |
| S3      | 2           | 2                     | 25.34                              | 5.3           | 56697           | 6.46         | 1.16E+05                        | 0.05               | GME5047_g            | Bilirubin oxidase                                     |
| S3      | 2           | 2                     | 26.07                              | 6.7           | 54002.5         | 5.46         | 6.35E+04                        | 0.03               | GME1840_g            | Cellobiohydrolaseii                                   |
| S3      | 6           | 5                     | 94.05                              | 7.6           | 87418.5         | 6.39         | 3.10E+05                        | 0.13               | GME2056_g            | Exo-beta-1,3-glucanase                                |
| S3      | 7           | 6                     | 81.69                              | 4.6           | 149581.5        | 6.45         | 8.86E+05                        | 0.38               | GME8409_g            | Hypothetical protein MGG_05540                        |
| S3      | 2           | 2                     | 30.33                              | 7.9           | 36148.2         | 5.21         | 1.86E+05                        | 0.08               | GME6304_g            | Hypothetical protein NECHADRAFT_82658                 |
| S3      | 2           | 2                     | 33.11                              | 3.3           | 56823.1         | 4.84         | 6.20E+05                        | 0.26               | GME4454_g            | Hypothetical protein SCHCODRAFT_258939                |
| S3      | 3           | 2                     | 34                                 | 3             | 74862.7         | 5.48         | 3.03E+06                        | 1.29               | GME2803_g            | Hypothetical protein SCHCODRAFT_66537                 |
| S3      | 12          | 9                     | 157.19                             | 16.4          | 64157.9         | 5.21         | 1.32E+06                        | 0.56               | GME8954_g            | Hypothetical protein SCHCODRAFT_78645                 |
| S3      | 10          | 7                     | 120.58                             | 10.4          | 76535.8         | 6.74         | 9.61E+05                        | 0.41               | GME3033_g            | Hypothetical protein SCHCODRAFT_78645                 |
| S3      | 5           | 4                     | 69.75                              | 19.6          | 19144           | 5.23         | 2.28E+06                        | 0.97               | GME272_g             | Lectin                                                |
| S3      | 2           | 2                     | 25.16                              | 6.8           | 29562.9         | 6.93         | 2.22E+05                        | 0.09               | GME271_g             | Lectin                                                |
| S3      | 2           | 2                     | 24.07                              | 3.3           | 70277.1         | 5.55         | 1.13E+05                        | 0.05               | GME1357_g            | Mannose-6-phosphatase                                 |
| S3      | 3           | 3                     | 52.72                              | 10            | 41772.9         | 5.25         | 4.67E+05                        | 0.20               | GME3687_g            | Polygalacturonase                                     |
| S3      | 3           | 2                     | 36.95                              | 5.4           | 56897.8         | 4.37         | 1.66E+05                        | 0.07               | GME9508_g            | Predicted protein                                     |

**Table S1, continued**

| Section | Spectra (#) | Distinct Peptides (#) | Distinct Summed MS/MS Search Score | % AA Coverage | Protein MW (Da) | Protein (pI) | Mean Peptide Spectral Intensity | Protein Relative % | Database Accession # | Protein Name                           |
|---------|-------------|-----------------------|------------------------------------|---------------|-----------------|--------------|---------------------------------|--------------------|----------------------|----------------------------------------|
| S3      | 2           | 2                     | 27.77                              | 5.4           | 34997.3         | 6.26         | 1.45E+05                        | 0.06               | GME4952_g            | Predicted protein                      |
| S3      | 3           | 2                     | 34.3                               | 5.9           | 45492.5         | 5.73         | 1.80E+06                        | 0.76               | GME4347_g            | Serine protease                        |
| S3      | 2           | 2                     | 31.26                              | 5.9           | 41051.9         | 6.58         | 1.57E+06                        | 0.67               | GME5911_g            | Serine protease                        |
| S4      | 6           | 3                     | 67.01                              | 10.3          | 42840.1         | 5.38         | 1.66E+06                        | 7.61               | GME1230_g            | 230NA                                  |
| S4      | 2           | 2                     | 38.42                              | 7.8           | 48560.2         | 5.51         | 6.25E+05                        | 2.86               | GME10601_g           | Agmatinase                             |
| S4      | 4           | 3                     | 51.35                              | 17.4          | 21871.2         | 5.25         | 1.10E+06                        | 5.02               | GME6918_g            | Hypothetical protein BC1G_08630        |
| S4      | 4           | 2                     | 30.68                              | 4.1           | 64157.9         | 5.21         | 2.02E+05                        | 0.92               | GME8954_g            | Hypothetical protein SCHCODRAFT_78645  |
| S4      | 7           | 5                     | 93.82                              | 43.9          | 19144           | 5.23         | 9.11E+05                        | 4.17               | GME272_g             | Lectin                                 |
| S4      | 2           | 2                     | 30.2                               | 6.8           | 29562.9         | 6.93         | 2.86E+05                        | 1.31               | GME271_g             | Lectin                                 |
| S4      | 5           | 5                     | 72.16                              | 19.4          | 34997.3         | 6.26         | 2.70E+05                        | 1.24               | GME4952_g            | Predicted protein                      |
| S4      | 2           | 2                     | 35.66                              | 5.4           | 56897.8         | 4.37         | 4.13E+05                        | 1.89               | GME9508_g            | Predicted protein                      |
| S4      | 3           | 2                     | 30.64                              | 10.5          | 32639.9         | 5.7          | 2.48E+05                        | 1.13               | GME3927_g            | Predicted protein                      |
| S4      | 3           | 2                     | 35.99                              | 8.2           | 39857.5         | 5.86         | 1.26E+06                        | 5.75               | GME3216_g            | Rnase Gf29                             |
| S4      | 3           | 2                     | 35.39                              | 4.4           | 89414.7         | 5.83         | 4.53E+05                        | 2.07               | GME7804_g            | Serine protease                        |
| S5      | 4           | 2                     | 45.01                              | 8.5           | 42840.1         | 5.38         | 2.03E+06                        | 7.73               | GME1230_g            | 230NA                                  |
| S5      | 4           | 3                     | 44.83                              | 20.5          | 16740.1         | 7.98         | 3.63E+05                        | 1.38               | GME7698_g            | Hypothetical protein SCHCODRAFT_74436  |
| S5      | 10          | 7                     | 117.22                             | 53.1          | 19144           | 5.23         | 2.01E+06                        | 7.66               | GME272_g             | Lectin                                 |
| S5      | 2           | 2                     | 29.73                              | 15.8          | 16747.6         | 5.27         | 7.65E+04                        | 0.29               | GME2200_g            | Lectin                                 |
| S5      | 2           | 2                     | 22.91                              | 5             | 36782.1         | 5.78         | 1.27E+05                        | 0.48               | GME10160_g           | Thioredoxin reductase                  |
| S6      | 4           | 3                     | 53.94                              | 12.1          | 42840.1         | 5.38         | 2.95E+05                        | 1.76               | GME1230_g            | 230NA                                  |
| S6      | 3           | 2                     | 31.83                              | 19.3          | 13281.2         | 9.48         | 7.87E+05                        | 4.68               | GME1876_g            | 876NA                                  |
| S6      | 3           | 2                     | 36.55                              | 6.4           | 38313.2         | 4.88         | 3.29E+05                        | 1.96               | GME9837_g            | Hypothetical protein SCHCODRAFT_103662 |
| S6      | 4           | 2                     | 29.96                              | 13.9          | 16740.1         | 7.98         | 2.20E+05                        | 1.31               | GME7698_g            | Hypothetical protein SCHCODRAFT_74436  |

**Table S1, continued**

| Section | Spectra (#) | Distinct Peptides (#) | Distinct Summed MS/MS Search Score | % AA Coverage | Protein MW (Da) | Protein (pI) | Mean Peptide Spectral Intensity | Protein Relative % | Database Accession # | Protein Name          |
|---------|-------------|-----------------------|------------------------------------|---------------|-----------------|--------------|---------------------------------|--------------------|----------------------|-----------------------|
| S6      | 5           | 4                     | 62.86                              | 19.6          | 19144           | 5.23         | 2.28E+05                        | 1.36               | GME272_g             | Lectin                |
| S6      | 3           | 2                     | 27.12                              | 16.6          | 18104.5         | 7.99         | 1.32E+06                        | 7.85               | GME4605_g            | Predicted protein     |
| S6      | 7           | 4                     | 53.81                              | 15.3          | 36782.1         | 5.78         | 2.57E+05                        | 1.53               | GME10160_g           | Thioredoxin reductase |
